# Supplementary material
Source: Springer Nature journal article supplement (https://www.springermedizin.de/resource/supplementary/12958_2009_636_MOESM4_ESM.pdf/9568358)

## Healthy follicle

## Atretic follicle

Anti-sense

Sense

Anti-sense

Sense

*GADD45A*

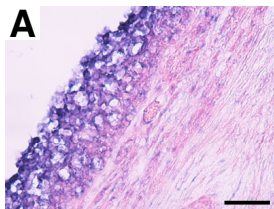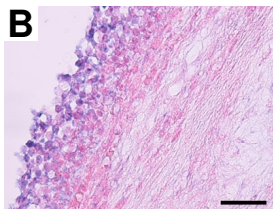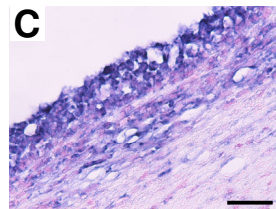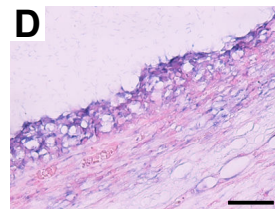

*IGFBP5*

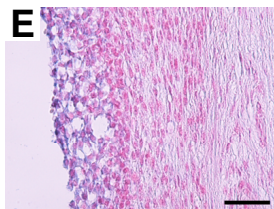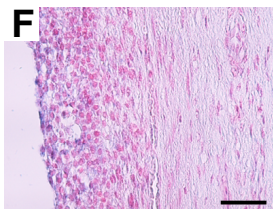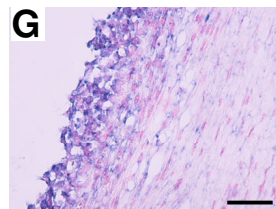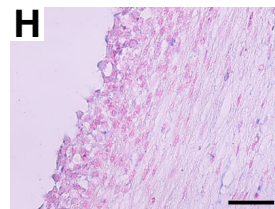

*TSP2*

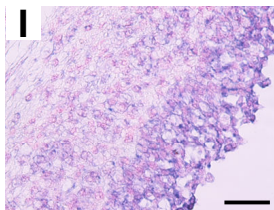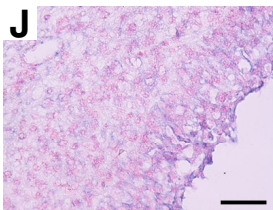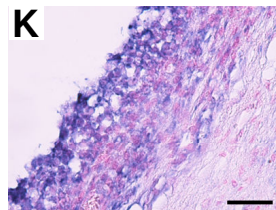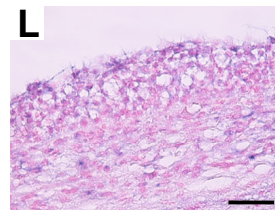

Supplement: MOESM4 [file 9568358]
